# Supplementary material for: Bi2OS2: a direct-gap two-dimensional semiconductor with high carrier mobility and surface electron states
Source: Royal Society of Chemistry journal article supplement (doi:10.1039/c8mh01001c), 2018-01-01
Supplement: c8mh01001c1.pdf [file c8mh01001c1.pdf]

**Supplementary Information for**  
**Bi<sub>2</sub>OS<sub>2</sub>: a Direct-Gap Two-dimensional Semiconductor with High**  
**Carrier Mobility and Surface Electron States**

Xiwen Zhang<sup>‡a</sup>, Bing Wang<sup>‡b</sup>, Xianghong Niu<sup>c</sup>, Yunhai Li<sup>b</sup>, Yunfei Chen<sup>d\*</sup> and  
Jinlan Wang<sup>b\*</sup>

<sup>a</sup> *School of Mechanism Engineering & School of Physics, Southeast University, Nanjing*  
*211189, China*

<sup>b</sup> *School of Physics, Southeast University, Nanjing 211189, China*

<sup>c</sup> *School of Science, Nanjing University of Posts and Telecommunications, Nanjing 210046,*  
*China*

<sup>d</sup> *School of Mechanism Engineering, Southeast University, Nanjing 211189, China*

<sup>‡</sup> Xiwen Zhang and Bing Wang contributed equally to this work.

Corresponding Authors: \*E-mail: [jlwang@seu.edu.cn](mailto:jlwang@seu.edu.cn); [yunfeichen@seu.edu.cn](mailto:yunfeichen@seu.edu.cn)

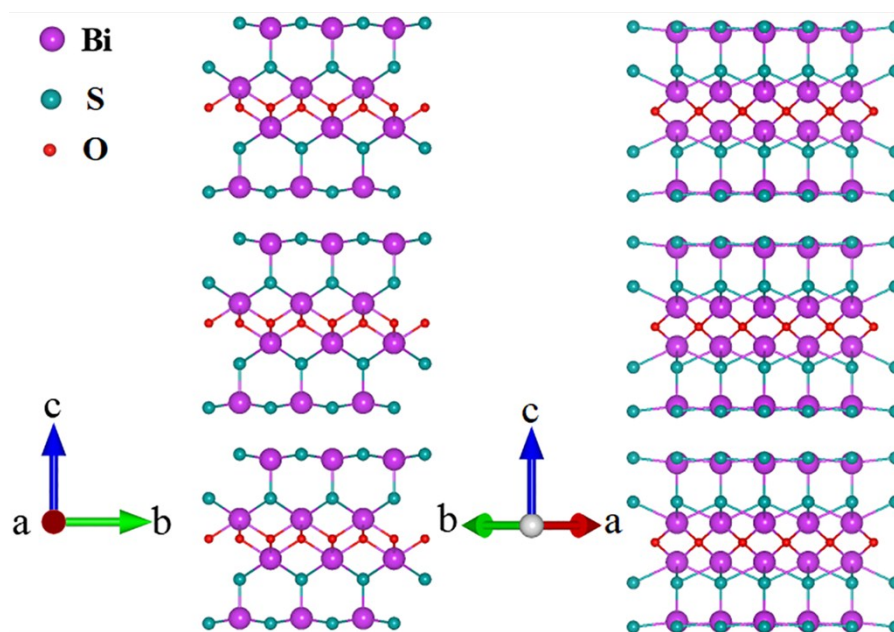

**Fig. S1** Structure of bulk  $\text{Bi}_2\text{OS}_2$  in a  $3 \times 3 \times 3$  supercell from different views.

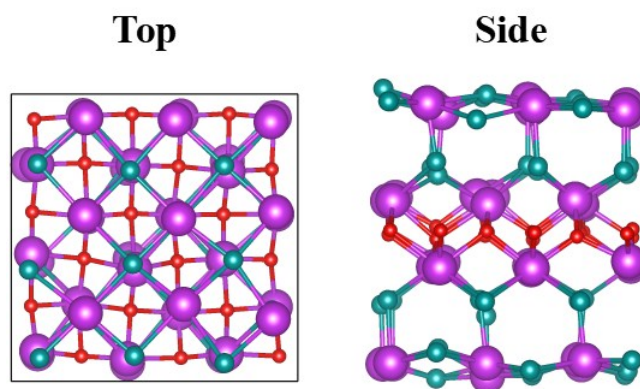

**Fig. S2** Snapshots of atomic configurations of  $\text{Bi}_2\text{OS}_2$  monolayer at temperatures of 500 K at the end of 5 ps.

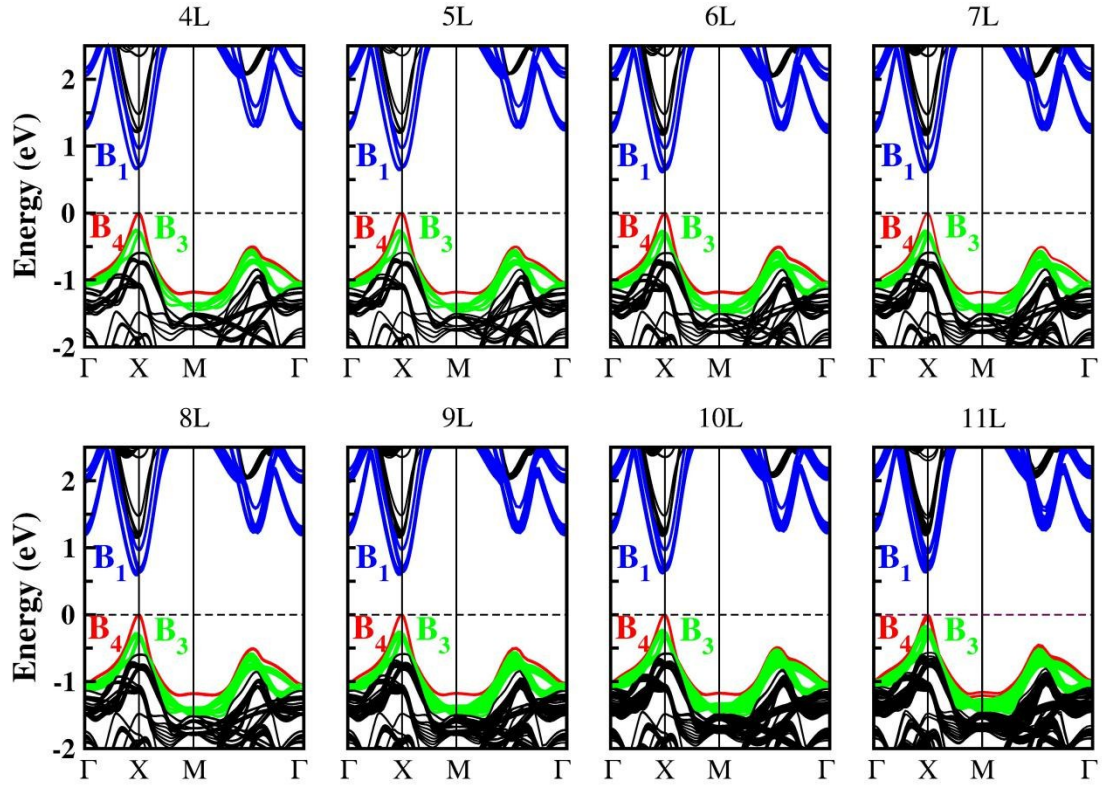

**Fig. S3** Calculated band structures of 2D Bi<sub>2</sub>OS<sub>2</sub> from 4L to 11L. Top of the valence band is set to zero.

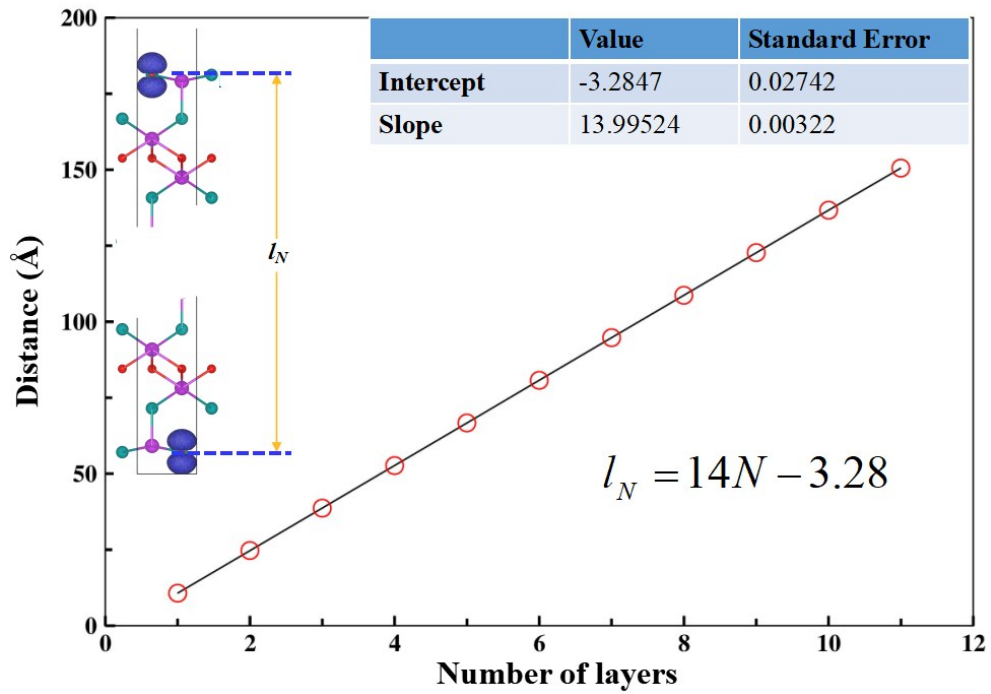

**Fig. S4** The distance between the two outermost layers exhibits a linear dependence on the number of layers.

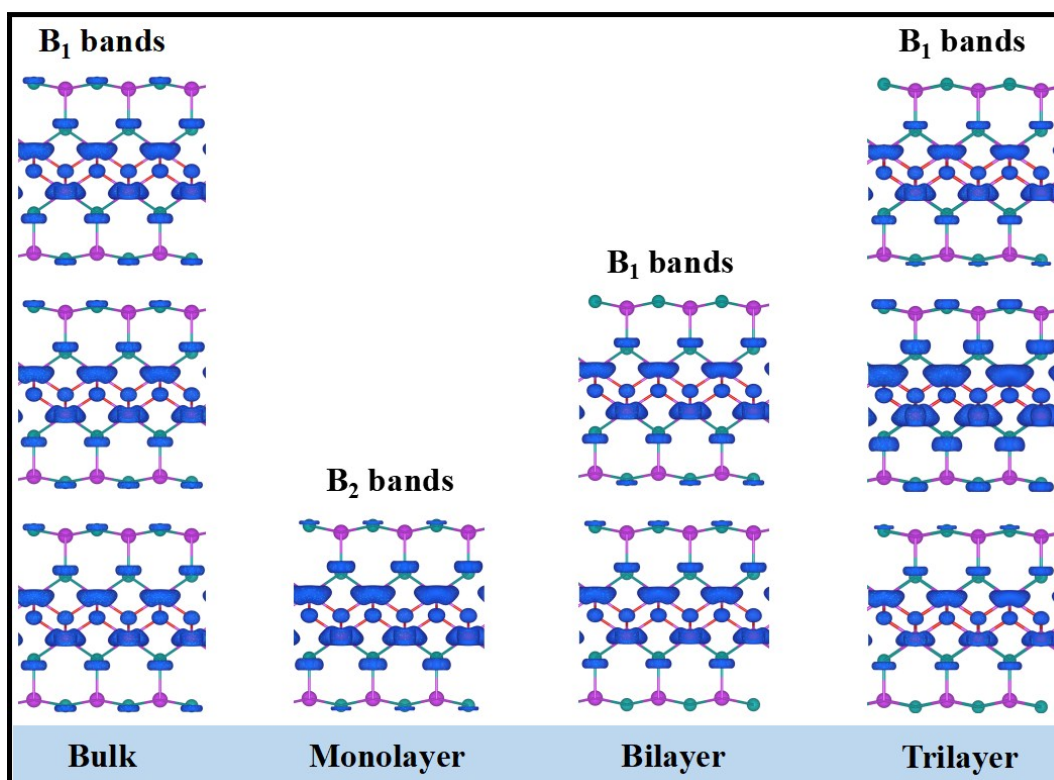

**Fig. S5** Calculated band decomposed charge density of the  $B_1$  and  $B_2$  bands (labeled in Figure 2a) with the isosurface values of  $0.01 \text{ e/bohr}^3$ .

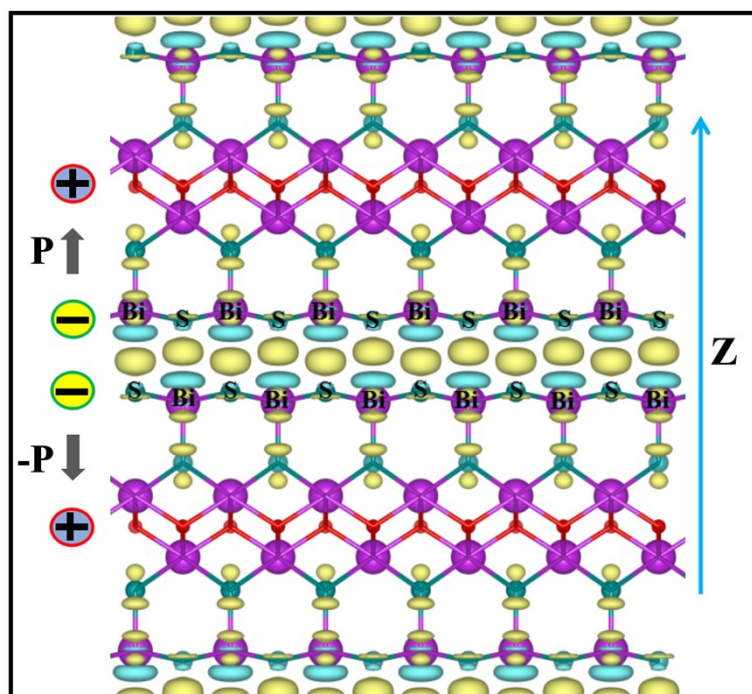

**Fig. S6** Different charge densities for the bulk  $\text{Bi}_2\text{OS}_2$  with an isovalue of  $0.0007 \text{ e/bohr}^3$ . The cyan and yellow regions represent the charge depletion and accumulation in the space, respectively.

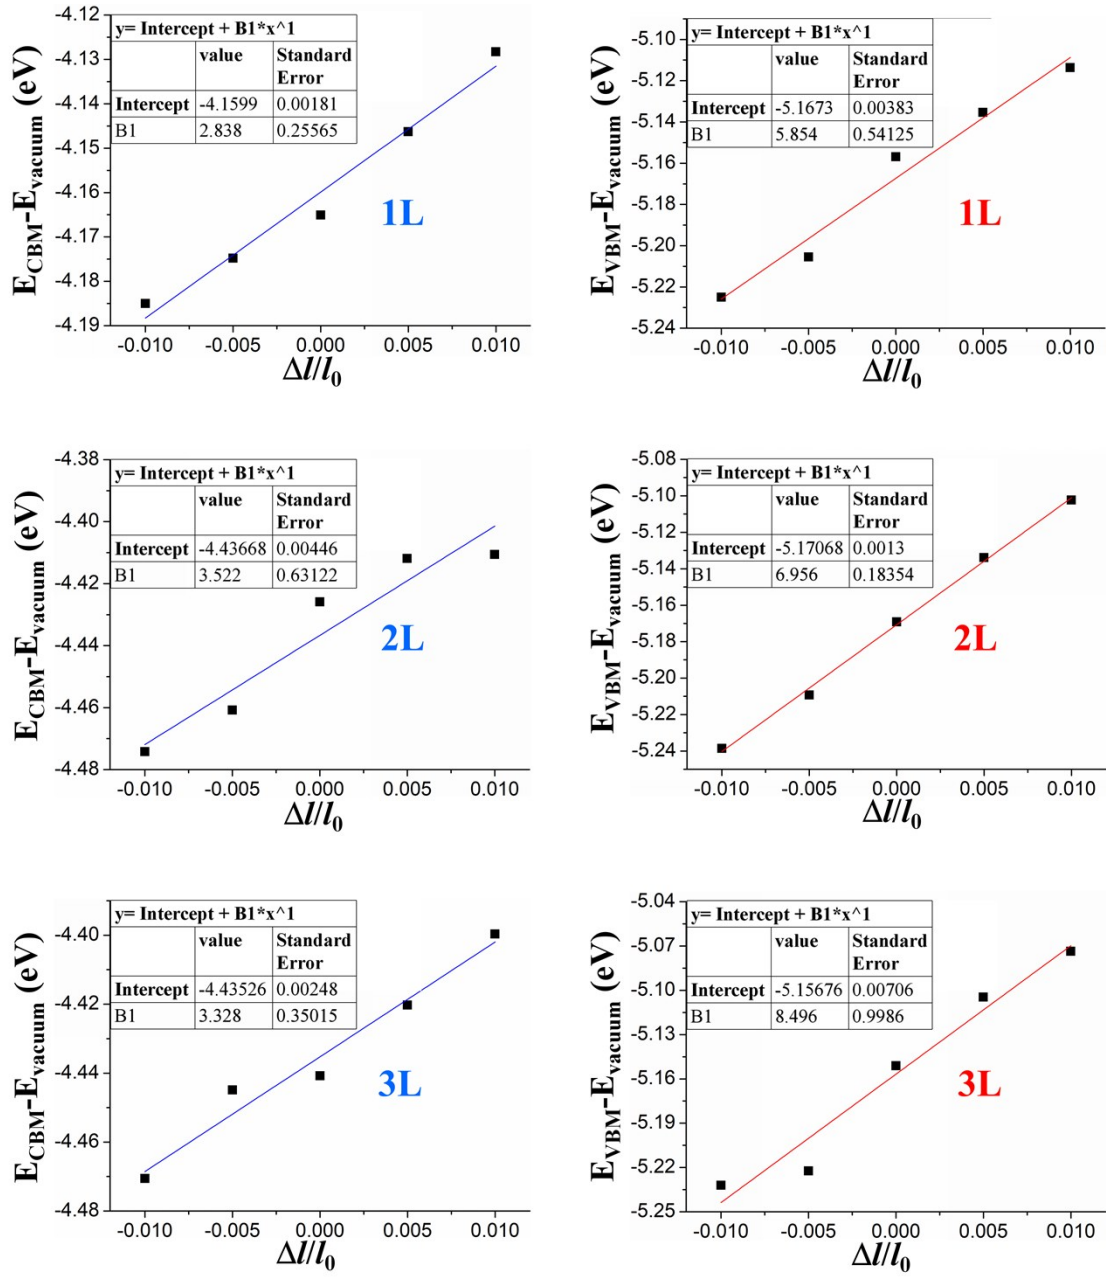

**Fig. S7** Linear fitting of deformation potential. Energy change of the CBMs and VBMs of Bi<sub>2</sub>OS<sub>2</sub> mono- and few layers with respect to the vacuum level as a function of lattice dilation.

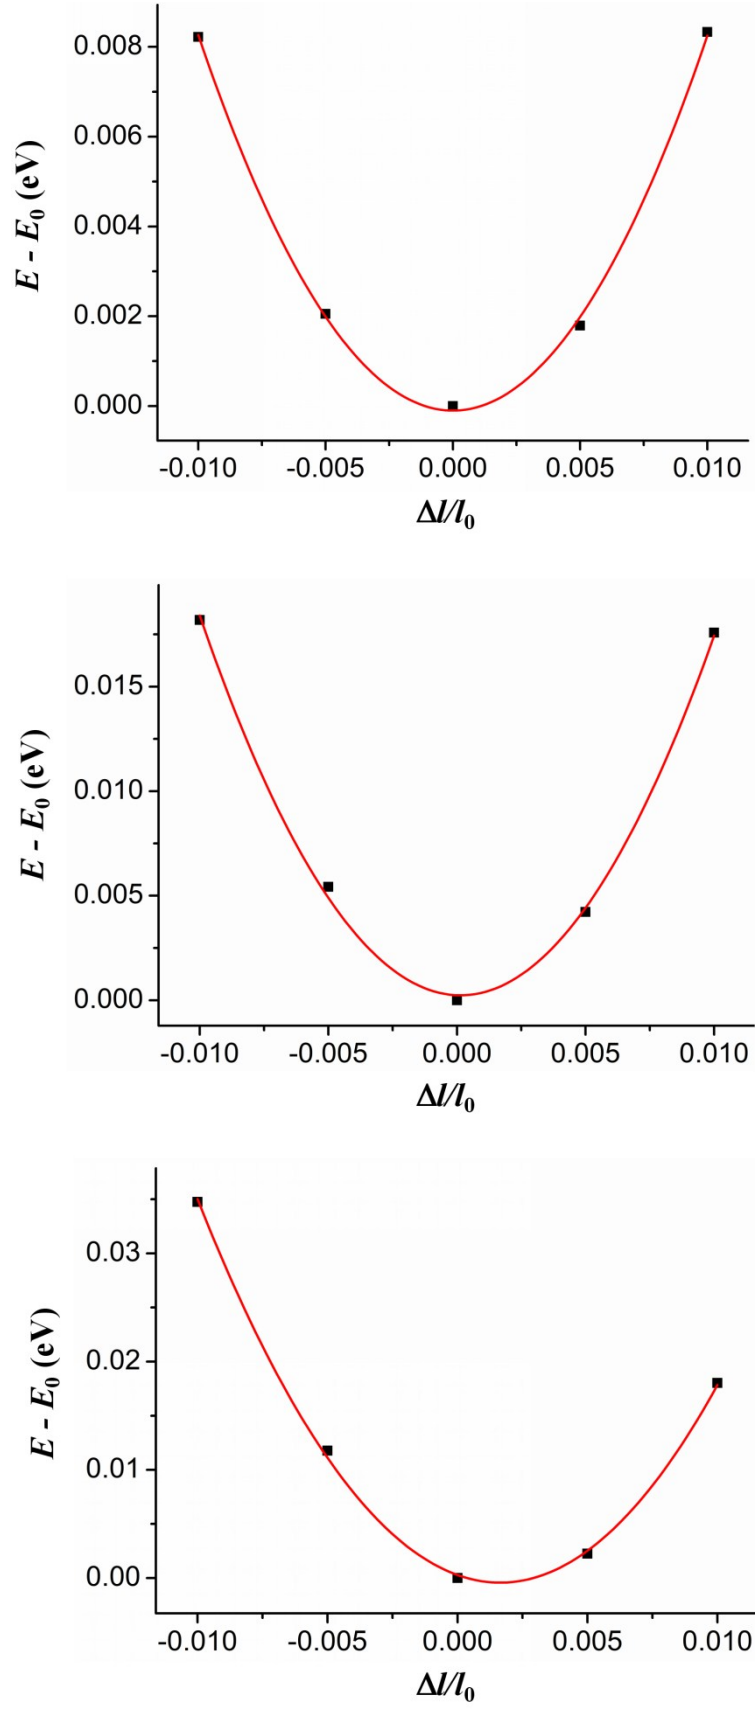

**Fig. S8** Total energy-strain curve of  $\text{Bi}_2\text{OS}_2$  mono- and few layers along x/y directions.

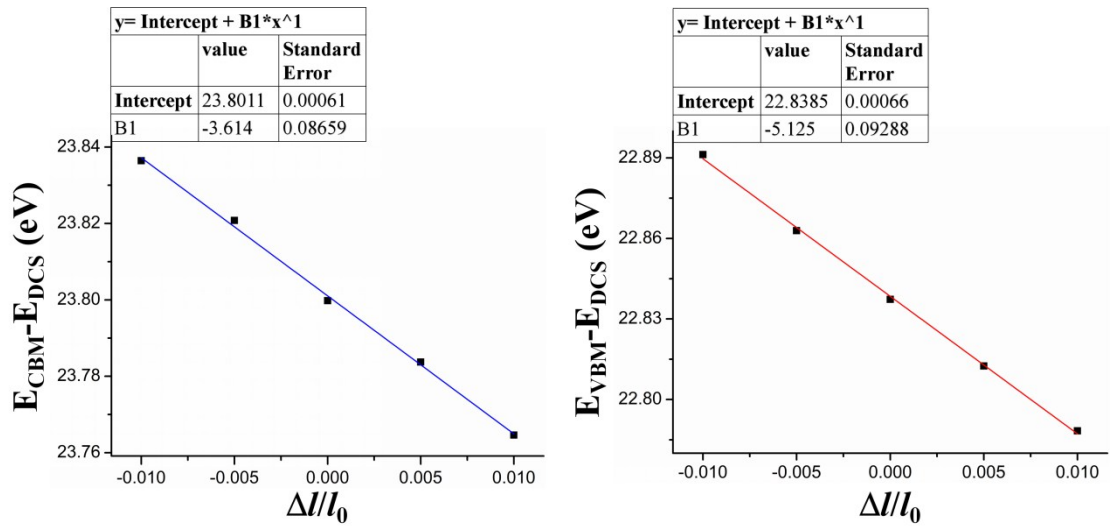

**Fig. S9** Linear fitting of deformation potential. Energy change of the CBM and VBM of  $\text{Bi}_2\text{OS}_2$  bulk with respect to the deep core states (DCS) as a function of lattice dilation.

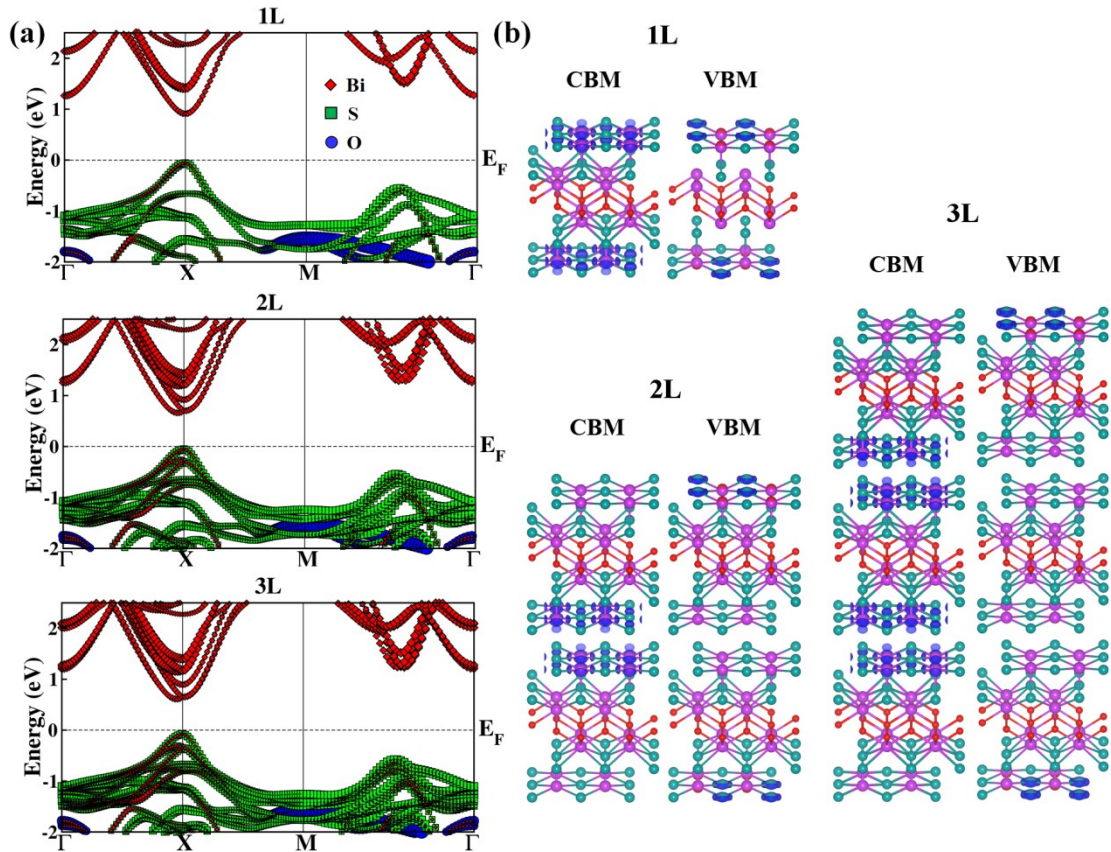

**Fig. S10** (a) Atom-resolved electronic band structures of  $\text{Bi}_2\text{OS}_2$  mono- and few-layers. The red, green, and blue dots represent the contributions from Bi, S, and O atoms. The symbol size is proportional to its population in corresponding atoms. (b)

Partial charge density is indicated in blue for conduction bands near the CBMs with an isovalue of 0.0022 e/bohr<sup>3</sup>, and for valence bands near the VBMs with an isovalue of 0.0003 e/bohr<sup>3</sup>. Magenta, blue-green, and red balls denote Bi, S, and O atoms, respectively.

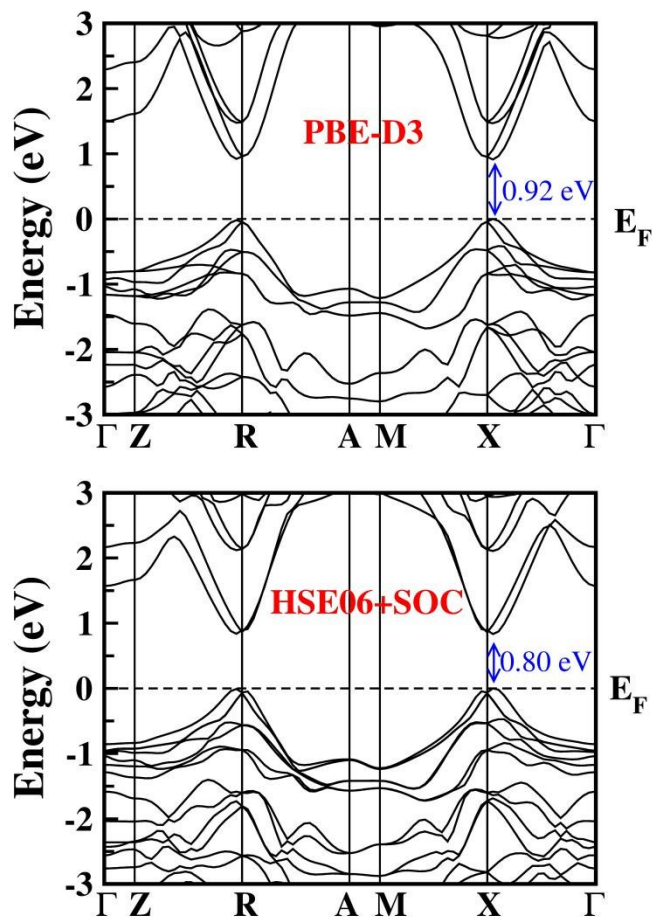

**Fig. S11** Electronic band structures of bulk Bi<sub>2</sub>OS<sub>2</sub> calculated at the PBE-D3 and HSE06+SOC level.

**Table S1** Computed effective mass ( $m^*$ ), 3D elastic modulus ( $C_{3D}$ ), deformation potential constant ( $|E^i|$ ), and in-plane hole and electron mobility ( $\mu$ ) of Bi<sub>2</sub>OS<sub>2</sub> bulk at 300 K

|             | Carrier Type | $m^*/m_e$ | $C_{3D}$ (Gpa) | $ E^i $ (eV) | $\mu$ (10 <sup>3</sup> cm <sup>2</sup> V <sup>-1</sup> s <sup>-1</sup> ) |
|-------------|--------------|-----------|----------------|--------------|--------------------------------------------------------------------------|
| <b>Bulk</b> | Electron     | 0.23      | 135            | 3.61         | 28.8                                                                     |
|             | Hole         | - 0.34    | 135            | 5.13         | 4.62                                                                     |
